# Supplementary material for: High-throughput screens using photo-highlighting discover BMP signaling in mitochondrial lipid oxidation
Source: Nat Commun. 2017 Oct 11;8:865. doi: 10.1038/s41467-017-00944-3 (PMC5636786; doi:10.1038/s41467-017-00944-3)
Supplement: Supplementary file 1 — Supplementary Information [file 41467_2017_944_MOESM1_ESM.pdf]

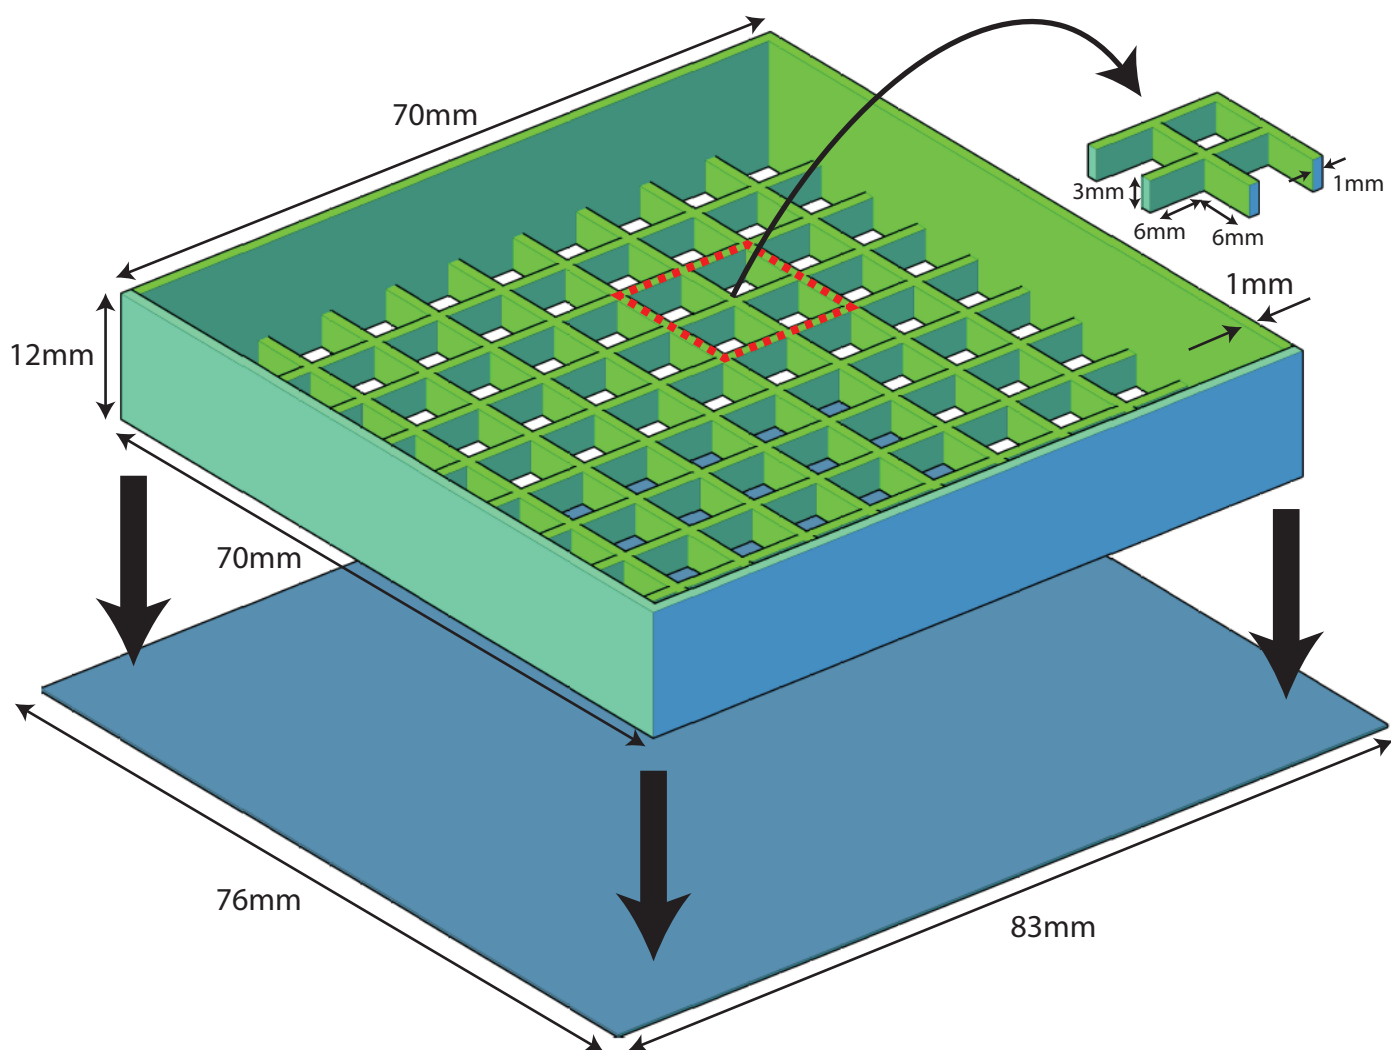

**Supplementary Figure 1. Design of imaging chambers for 3D printing.**

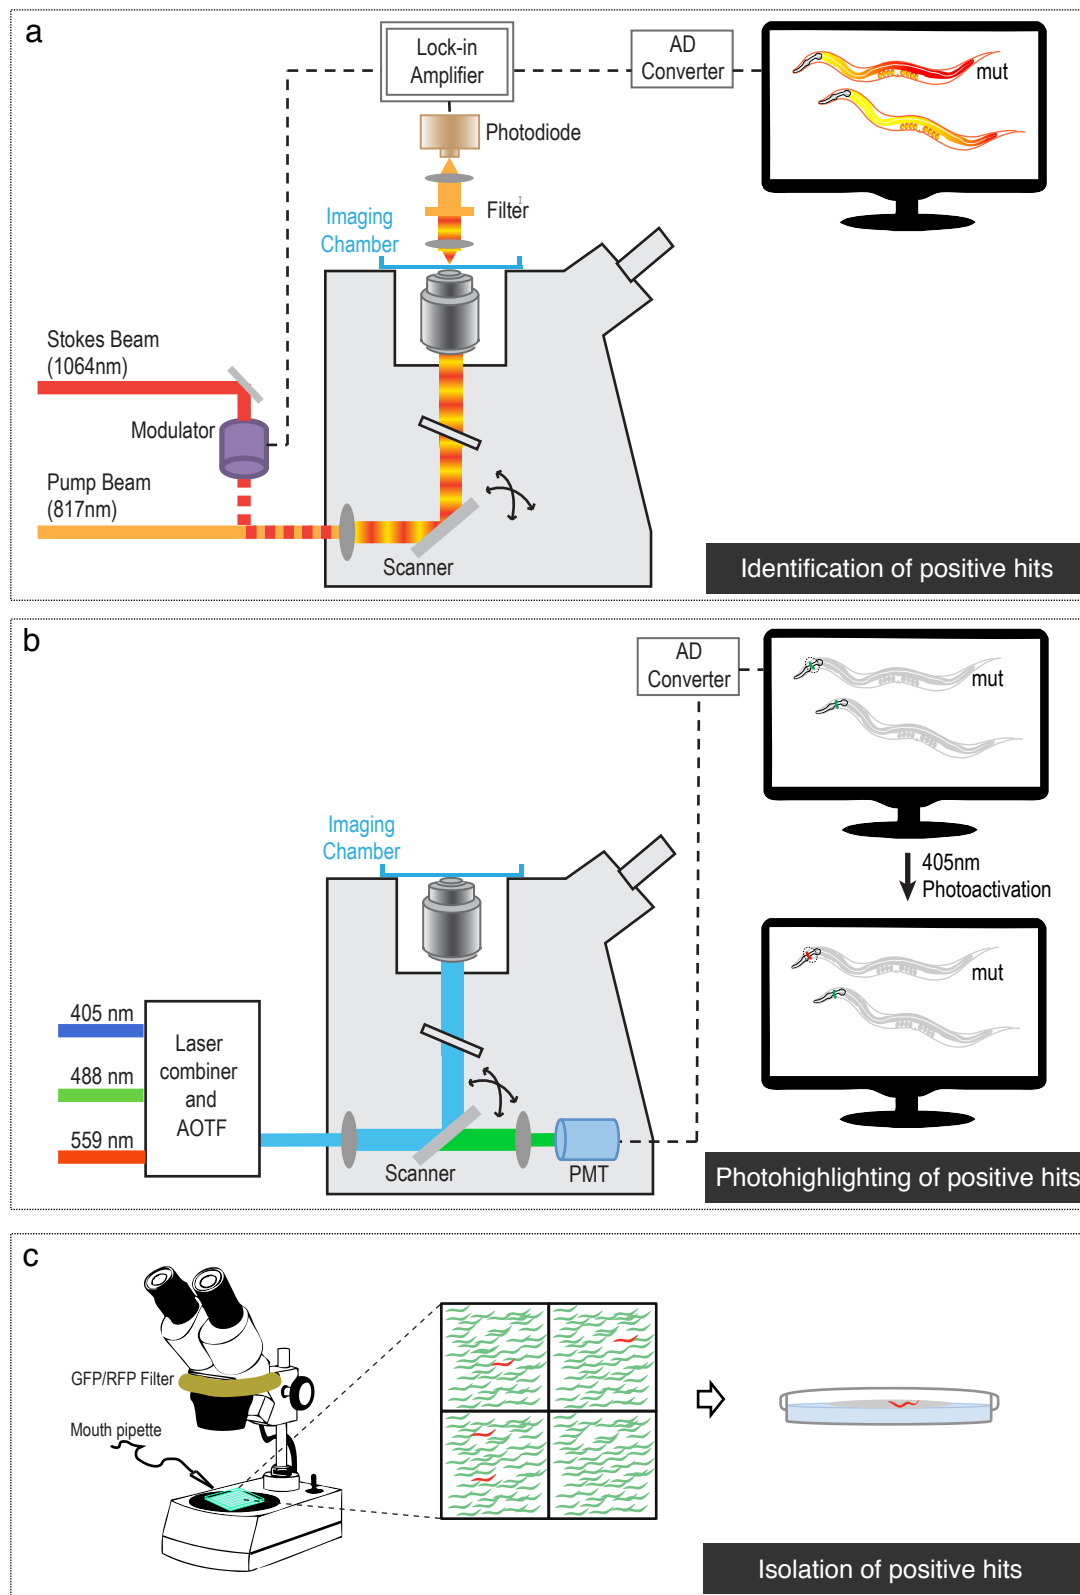

**Supplementary Figure 2. Experimental scheme of high-throughput genetic screening.**

**(a)** Diagram of the optical components for SRS microscopy built on a laser scanning confocal microscope. **(b)** Diagram of the conventional confocal imaging components on the same microscope used for photo-highlighting. PMT, photomultiplier tube. AOTF, acousto-optic tunable filters. **(c)** Recovery of photo-highlighted positive hits under a fluorescent dissection scope.

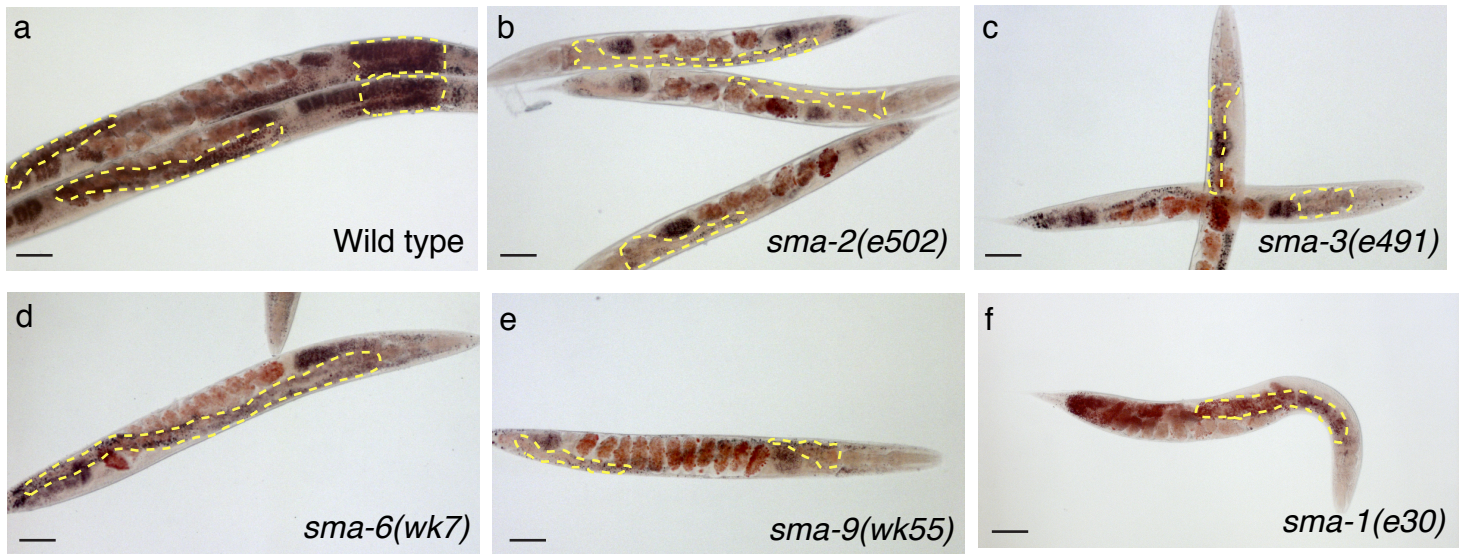

### Supplementary Figure 3. Oil Red O staining images of *sma* mutants.

Representative images show lipid content levels in 1-day-old adult worms stained with Oil Red O. Yellow dashed lines indicate intestine areas. Scale bar=50  $\mu\text{m}$ . Compared to wild type controls (a), lipid content levels are reduced in the *sma* mutants of the BMP signaling pathway (b-e), but not in the non-BMP *sma* mutant (f).

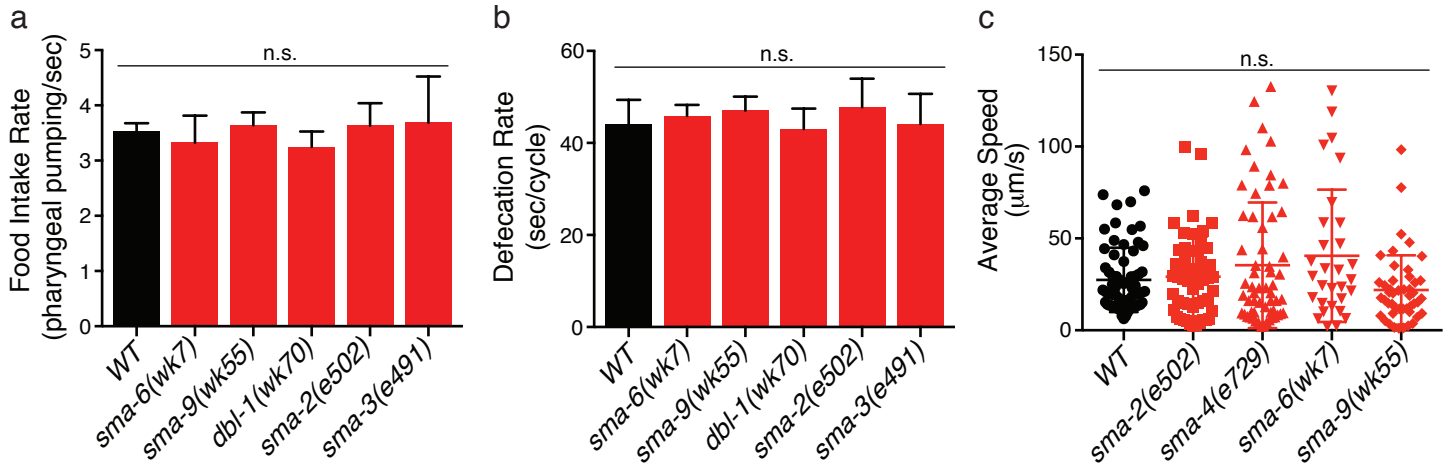

#### Supplementary Figure 4. Physiological measurement of *sma*/BMP pathway mutants.

Compared to wild type (WT) worms, the *sma* mutants show similar food intake rate (**a**,  $n=12$ ), defecation interval (**b**,  $n=10$ ), and locomotion activity (**c**,  $n=66$  for WT,  $n=53$  for *sma-2*,  $n=59$  for *sma-4*,  $n=30$  for *sma-6*,  $n=47$  for *sma-9*). Error bars represent means $\pm$ s.d., n.s.  $p>0.05$  by one-way ANOVA.

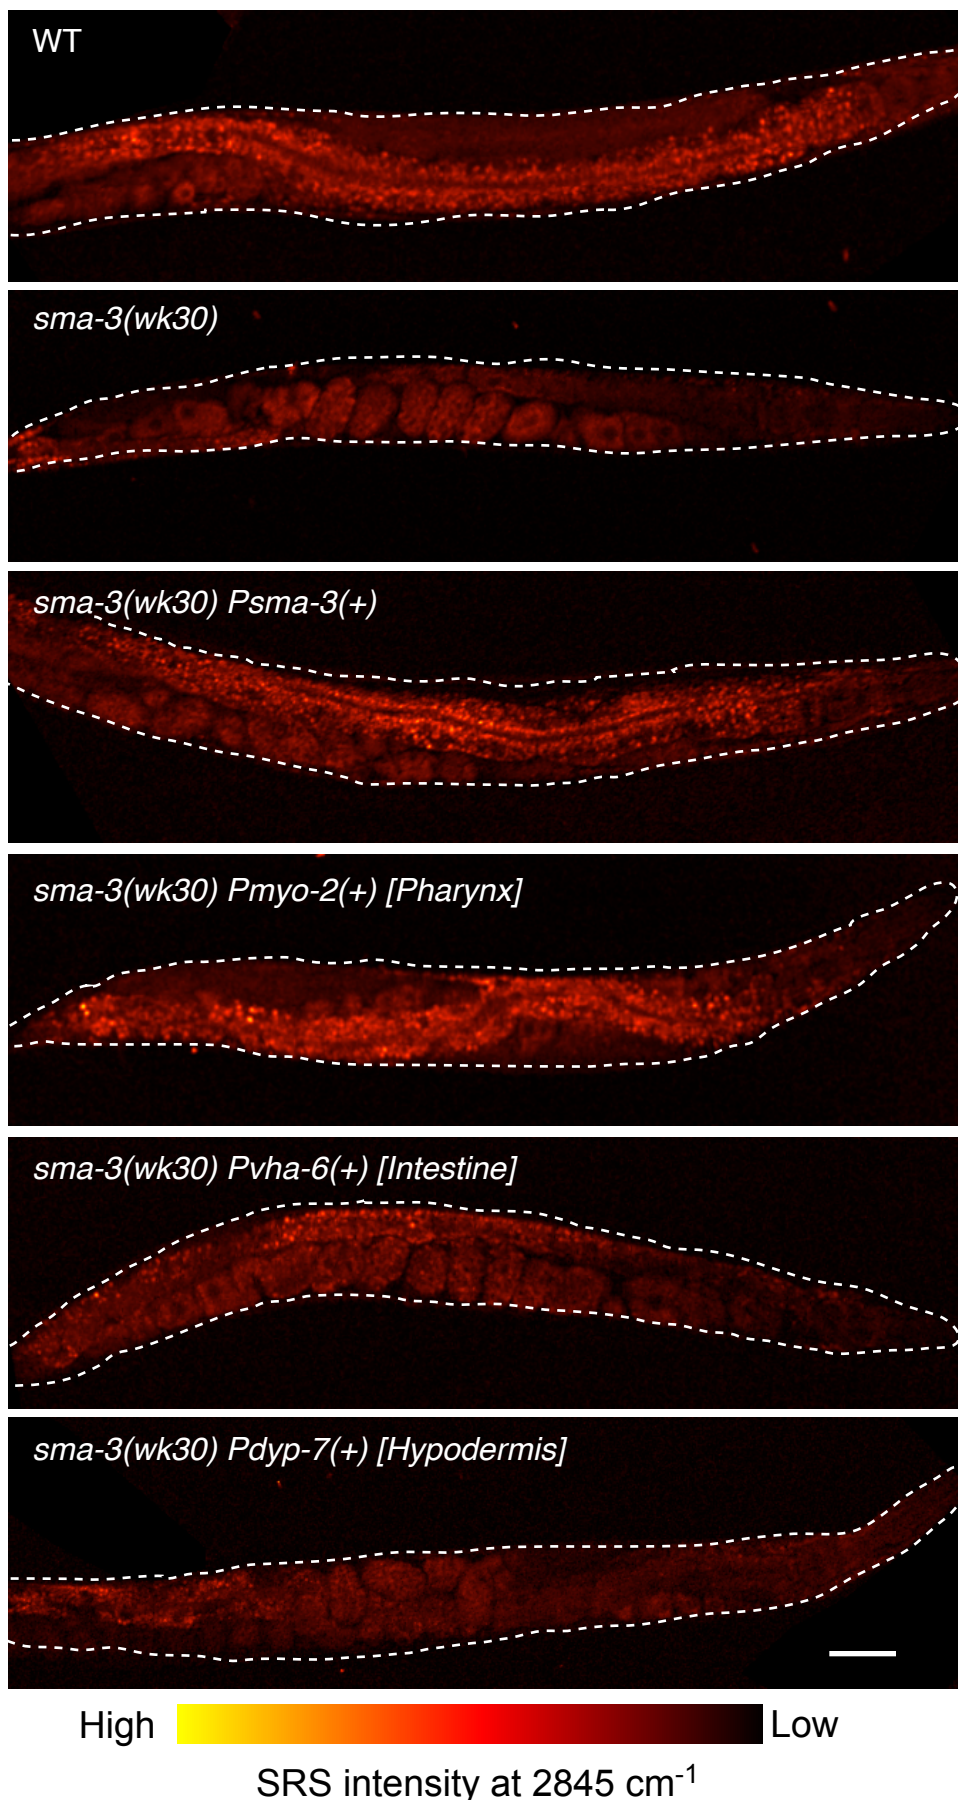

**Supplementary Figure 5. Representative SRS images show lipid contents in wild-type, *sma-3* mutant, and *sma-3* tissue specific rescue strains.**

Quantification results are shown in Fig. 3e. Dashed lines indicate the boundary of worms. Scale bar=50  $\mu$ m.

a

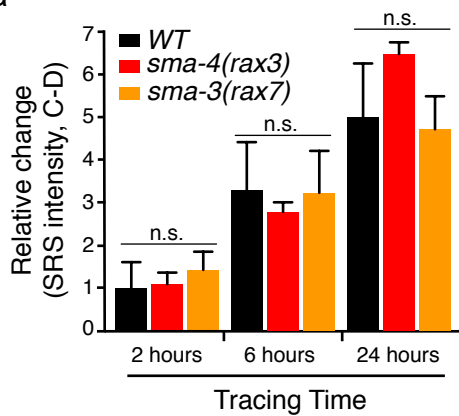

b

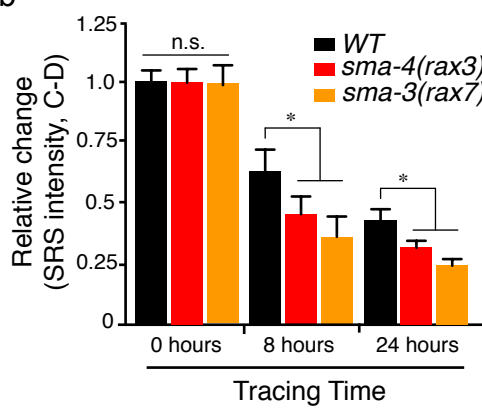

**Supplementary Figure 6. Another iSRS replicate results reveal the regulation of lipid mobilization by BMP signaling.**

(a) The BMP/*sma* mutants do not affect lipid synthesis, n.s.  $p > 0.05$ ,  $n = 5$ .

(b) The BMP/*sma* mutants accelerate lipid mobilization, n.s.  $p > 0.05$ , \*  $p < 0.05$ ,  $n = 5$ .

In all bar charts, data represent mean  $\pm$  s.d., p value is determined by a Student's t-test (unpaired, two-tailed).

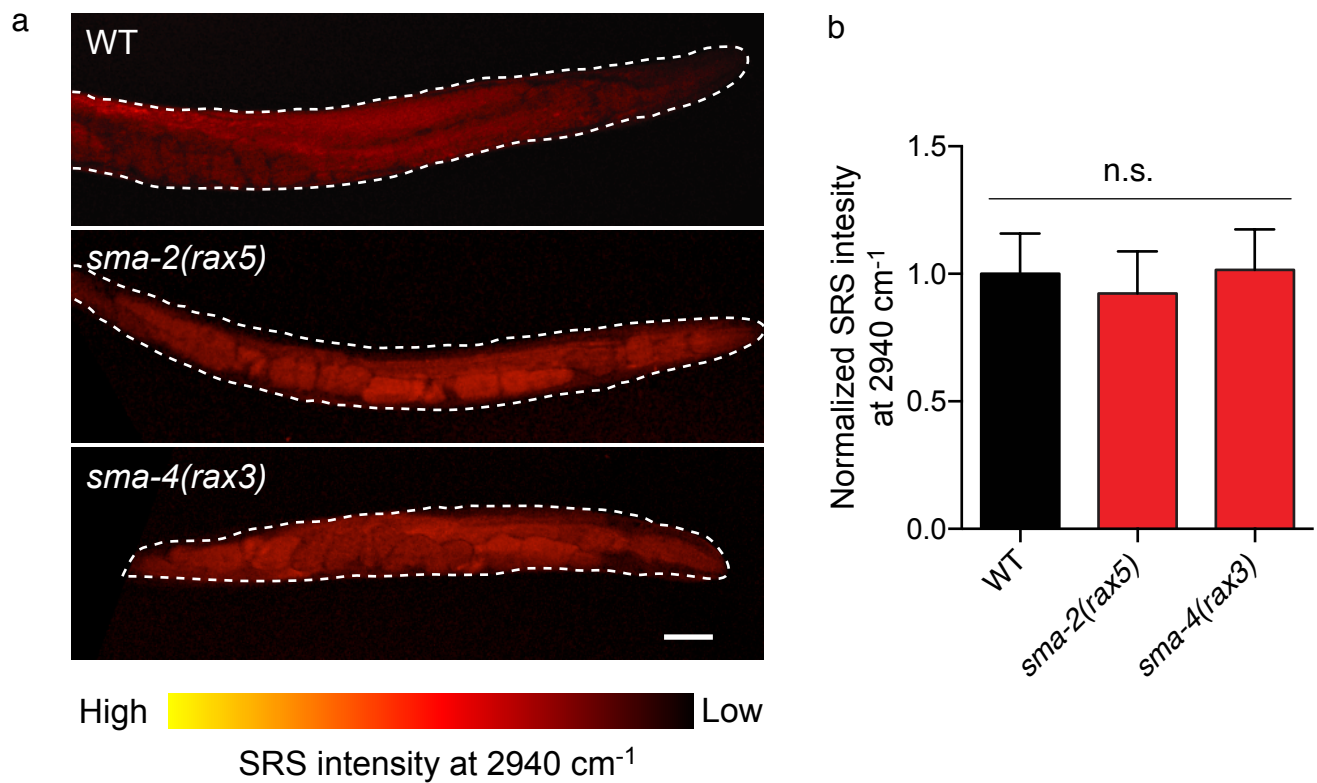

**Supplementary Figure 7. SRS imaging at 2940 cm<sup>-1</sup> reveals unchanged protein levels in *sma* mutants.**

**(a)** Example SRS images at 2940 cm<sup>-1</sup>. Dashed lines indicate the boundary of animals. Scale bar=50  $\mu$ m.

**(b)** Quantification of SRS signal intensity at 2940 cm<sup>-1</sup>. n.s.  $p>0.05$  Student's *t*-test,  $n=43$  for WT,  $n=25$  for *sma-2*,  $n=44$  for *sma-4*.

**Supplementary Table 1. qPCR primers**

|                   |                           |
|-------------------|---------------------------|
| <i>acs-2</i> FWD  | TTCGACCGGATGAGCCAGTAAACA  |
| <i>acs-2</i> REV  | GTTGTTGTTTCAGCCCGAAATGGGT |
| <i>cpt-4</i> FWD  | CAGAAACATCGCCAGTCTCA      |
| <i>cpt-4</i> REV  | TCCATCCACTGACATCACAAA     |
| <i>acs-18</i> FWD | TGTGGCTCCAGATCTCACAG      |
| <i>acs-18</i> REV | GATCTGGGACAACGATTGCT      |
| <i>act-1</i> FWD  | GCTGGACGTGATCTTACTGATTACC |
| <i>act-1</i> REV  | GTAGCAGAGCTTCTCCTTGATGTC  |
| <i>rpl-32</i> FWD | AGGGAATTGATAACCGTGTCCGCA  |
| <i>rpl-32</i> REV | TGTAGGACTGCATGAGGAGCATGT  |
